# Supplementary material for: The state of plant conservation in Canada: a survey of practitioners
Source: Atypon-hosted journal article supplement (doi:10.1139/facets-2023-0216), 2024-01-01
Supplement: facets-2023-0216suppla.pdf [file facets-2023-0216suppla.pdf]

## Supplementary Material 1

### McCune et al. The state of plant conservation in Canada: a survey of practitioners

#### Survey questions and Consent Page – in English and en Français

#### Survey of Canadian Plant Conservation Practitioners and Researchers

#### Enquête auprès des praticiens et des chercheurs canadiens en conservation des plantes

Please select your preferred language:

Veillez sélectionner votre langue préférée:

- English
- Français

*[first option will direct to version in English, second option will direct to version in French]*

#### Survey of Canadian Plant Conservation Practitioners and Researchers

Thank you for viewing this survey about plant conservation in Canada. It was designed by a working group of Canadian scientists who study plants and plant conservation, led by Dr. Jenny McCune, University of Lethbridge ([jl.mccune@uleth.ca](mailto:jl.mccune@uleth.ca)).

The purpose of this study is to identify what the **major knowledge gaps that are hindering conservation and recovery of plant species at risk in Canada**, and barriers to research needed to fill these gaps.

We would like to invite you to provide your experience and opinions on these issues in the following **one-time online survey**, with approximately **20 questions**, which will take approximately **15 minutes**.

Your answers will benefit plant conservation by consolidating knowledge on plant conservation issues and knowledge gaps. You will not benefit directly from participation in this research. You will experience minimal inconvenience in time spent.

All data will be published in aggregate form and you will never be identified. All anonymous responses will be stored on secure servers and password-protected computers. We will keep the response data indefinitely, and the aggregated data may be placed on a digital data storage platform such as Dryad. All identifying information will be deleted after we have sent follow-up information on the survey results to those participants who requested it. We will collect IP addresses to verify that participants do not take the survey twice, and immediately after this is done all IP addresses will be destroyed.

The data will be part of a scientific paper on the gaps in knowledge regarding plant conservation in Canada. If you provide your name and email address, we will notify you when the study is

published. Doing so is completely optional and your name or email will not be linked to your responses.

Your participation is voluntary, and you can quit the survey at any time. Responses will only be submitted if you click the 'SUBMIT' button at the end of the survey. If there is any question you do not want to answer, simply choose "Other" and enter "prefer not to answer".

Note that because this is an online survey, we cannot completely guarantee your privacy. By clicking 'SUBMIT' at the end of the survey, you acknowledge that you have read the study objectives and procedures written here, and voluntarily agree to participate in this survey. Once you press 'SUBMIT', we cannot delete your responses because individual responses will not be identifiable at that point.

If you would like a copy of this consent form, please contact [jl.mccune@uleth.ca](mailto:jl.mccune@uleth.ca) or select the print button to print this information.

Questions regarding your rights as a participant in this research may be addressed to the Office of Research Ethics, University of Lethbridge (Phone: 403-329-2747 or Email: [research.services@uleth.ca](mailto:research.services@uleth.ca))

Click "next" to begin the survey.

- Q1. Please confirm that you are 18 years of age or older
- Yes, I am 18 years of age or older
  - I am under the age of 18.

*[if the second choice is selected, participants directed to a page that states: "Thank you for your interest in this Survey of Canadian Plant Conservation Practitioners and Researchers. You must be 18 years of age or older to participate."]*

- Q2. About what proportion of your daily work involves activities that require knowledge of plant ecology/evolution or plant conservation/restoration? (select one)
- less than 10%
  - 10-20%
  - 20-30%
  - 30-40%
  - 40-50%
  - 50-60%
  - 60-70%
  - 70-80%
  - 80-90%
  - 90-100%
  - Other (enter answer)

Q3. What term best describes your main, current employer? (or, if not currently employed, your most recent employer) (select one)

- sub-municipal government (e.g. Conservation Authority, Township)
- municipal government (e.g. County, City)
- provincial government department
- federal government department
- First Nation or Tribal Government
- small consulting firm or other small company (e.g. native plant nursery)
- large consulting firm or other larger company (e.g. large restoration firm)
- small non-profit (e.g. small land trust)
- large non-profit (e.g. NCC, WWF, WPC)
- academic institution (University or College)
- self-employed
- Other (enter answer)

Q4. What is your educational background in plant conservation, plant restoration, or plant-related research? (select all that apply)

- self-taught/learned by experience
- apprenticeship or spending time with experts
- high school
- community/technical college
- undergraduate degree
- MSc degree
- PhD degree
- Other (enter answer)

Q5. If you have an undergraduate degree, what was it in? (e.g. Botany, Plant Sciences, Biology/Biological Sciences, etc.) (select one)

- not applicable
- degree subject: (enter answer)

Q6. How did you develop an interest in plant ecology/evolution or plant conservation/restoration? (select all that apply)

- I have always loved plants.
- My childhood spent gardening, camping, or otherwise outdoors.
- I had a great mentor during high school or my undergraduate degree.
- It was mainly just circumstance, our company/organization/lab needed someone to do plant-related work.
- Other: (enter answer)

Q7. In what province or territory do you live? (select one)

- Alberta
- British Columbia
- Manitoba
- New Brunswick
- Newfoundland and Labrador
- Northwest Territories
- Nova Scotia
- Nunavut
- Ontario
- Prince Edward Island
- Quebec
- Saskatchewan
- Yukon
- Other: (enter text)

Q8. What is your age? (select one)

- under 20 years old
- 20-30 years old
- 30-40 years old
- 40-50 years old
- 50-60 years old
- 60-70 years old
- 70-80 years old
- 80-90 years old
- 90-100 years old
- Other: (enter answer)

Q9. For how long have you been doing work relating to plant ecology/evolution or plant conservation/restoration? (select one)

- less than 5 years
- 5-10 years
- 10-15 years
- 15-20 years
- 20-25 years
- 25-30 years
- 30-35 years
- 35-40 years
- more than 40 years
- Other: (enter answer)

Q10. What tasks or research related to plant ecology/evolution or plant conservation/restoration do you work on as part of your job? This can be direct, hands-on work and/or managing/directing these activities. (select all that apply)

- use plants to study evolutionary theory
- use plants to study ecological theory
- measure genetic diversity within and between populations
- measure genetic diversity related to disease resistance
- population censuses
- conservation status assessments (e.g. participating on threats calls, writing status reports or recovery strategies)
- management of natural areas to protect native plants (e.g. removal of weeds, fencing out herbivores, re-routing human trails, preventing poaching, treating disease)
- restoration or revegetation (e.g. collecting seeds of native plants, growing seedlings, outplanting them in the wild)
- seed collecting and propagation of native plants
- surveying for occurrences of rare plants
- outreach to raise the profile of native plants and/or plant species at risk amongst landowners or the general public
- regulation-related work (e.g. issuing permits, assessing impact of proposed development projects on vegetation or plant species at risk, consulting on impact assessments)
- Other: (enter answer)

Q11. If you are a researcher at an academic institution, does your research program include work on rare plants (e.g. plant species ranked S1, S2, or S3 by NatureServe or listed under Federal or Provincial endangered species laws)? (select one)

- I am not an academic researcher
- yes
- yes in the past, but not currently
- rarely
- no
- Other: (enter answer)

Q12. If you are an academic researcher and you have studied rare plants in your research program, which species have you studied? (select one)

- I am not an academic researcher
- Species: (enter answer)
- Other: (enter answer)

Q13. *[for those who answer not currently, rarely, or no to Q11]*

What are the primary challenges/difficulties that prevent you from doing more research involving plant species at risk? (select all that apply)

- I'm just not interested in these species
- it is difficult to get good sample sizes
- it is too risky
- it is difficult to get permits to do manipulative experiments on rare plants
- I am primarily motivated by fundamental theoretical questions, so I choose the most amenable study system for that
- I don't know what research is needed in this area
- the research that is needed in this area is not novel enough for me to get strong publications and advance my career
- it is difficult to get funding to work on rare plants
- Other: (enter answer)

Q14. Considering what you know about plant conservation and recovery of plant species at risk in Canada, which of the following best describes your opinion of Canada's progress in this area? (select one)

- I don't know enough about the situation to comment.
- Canada is doing very well. We have listed a lot of plants under the Species at Risk Act, and this is leading to meaningful recovery actions.
- Canada is average. We should not expect as much attention or funding for plants as there is for charismatic mammals, birds and fish. There has been good funding and attention for a few plant species at risk, but we could do better, as could most countries.
- Canada is under-performing, especially compared to other countries. There are a handful of dedicated folks and some good things are happening, but it's a drop in the ocean compared to the need.
- Other: (enter answer)

Q15. In your opinion, what are the two most pressing gaps that are preventing conservation and recovery of plant species at risk in your region or in Canada as a whole? (select two)

- we need more surveys to locate undiscovered populations
- we need more assessment and monitoring of rare plant populations over time
- we need a better understanding of genetic diversity
- we need more formal experimental tests of threats and threat mitigation strategies
- we need more reintroduction and population augmentation
- we need to protect more land that includes important habitat
- we need to train more plant conservation biologists
- we need more research on these species and how to conserve them
- we need to do more landowner and/or public outreach about plant species at risk
- we need tougher laws to protect extant populations of plant species at risk, and effective enforcement of these laws
- we need more funding from governments for research and applied management to recover plant species at risk
- we need more funding from governments for research and applied management to recover all species at risk, not only plants
- we need to raise the profile of plant species at risk among the general public

- Other: (enter answer)
- Other: (enter answer)

Q16. Please enter any additional comments you have about knowledge gaps or other factors that are preventing conservation and recovery of plant species at risk in your region or in Canada as a whole

- Enter text: (enter answer)
- I have nothing to add
- Prefer not to answer

Q17. Which of the following statements most closely matches your opinion about reintroducing plant species at risk to sites where they have been extirpated, or to suitable sites within their known historical range, to aid recovery and reduce the likelihood of extinction? (select one)

- I don't know enough about the situation to give an opinion.
- We should avoid doing this. The priority has to be in situ conservation of extant populations.
- We ought to be doing more of this. Reintroductions could help bolster the number of populations of highly endangered species.
- It might be a good thing to try, but it will not work for all species. I would support doing some more research into the possibilities for certain species.
- Other: (enter answer)

Q18. Approximately 75% of plant species at risk in Canada are at the edge of their North American range in Canada, and many are not at risk south of the border. Which of the following statements most closely aligns with your opinion? (select one)

- Canadian endemic plant species should be prioritized for conservation funding and research.
- Canadian endemic plant species and species that are rare across their entire range should be prioritized for conservation funding and research.
- Canadian plant species at risk should not be prioritized for conservation funding and research based on their status outside of Canada.
- Other: (enter answer)

Q19. Do you have anything else you would like to add or comment on in relation to conservation and recovery of plant species at risk in Canada? Please type it below or select "no comments to add".

- enter comment: (enter answer)
- no comments to add

Q20. By clicking SUBMIT, you acknowledge that you have read the study objectives and procedures at the start of this survey and voluntarily agree to participate in this survey.

SUBMIT

Q21. Thank you for your participation! If you would like to share your name and/or email with the researchers, to receive updates on this research, please enter below. Note that your name/email will NOT be associated with your responses in any published results of this study. If you prefer to stay anonymous, select “I wish to stay anonymous”.

- enter name and/or address: (enter text)
- I wish to stay anonymous



## Survey of Canadian Plant Conservation Practitioners and Researchers Sondage auprès des praticiens et des chercheurs canadiens en conservation des plantes

Please select your preferred language:

Veuillez sélectionner votre langue préférée:

- English
- Français

*[first option will direct to version in English, second option will direct to version in French]*

### Sondage auprès des praticiens et des chercheurs canadiens en conservation des plantes

Merci de consulter ce sondage sur la conservation des plantes au Canada. Il a été conçu par un groupe de travail composé de scientifiques canadiens qui étudient les plantes et la conservation des plantes, et dirigé par Jenny McCune, professeure à l'Université de Lethbridge ([jl.mccune@uleth.ca](mailto:jl.mccune@uleth.ca)).

Le but de cette étude est d'identifier les **principales lacunes dans les connaissances qui entravent la conservation et le rétablissement des espèces végétales en péril au Canada**, ainsi que les obstacles à la recherche nécessaire pour combler ces lacunes.

Nous vous invitons à nous faire part de votre expérience et de vos opinions sur ces questions dans le **sondage en ligne ponctuel** suivant, qui comprend environ **20 questions** et prendra approximativement **15 minutes** à compléter.

Vos réponses profiteront à la conservation des plantes en consolidant les connaissances sur les problèmes de conservation des plantes et les lacunes dans les connaissances. Vous ne bénéficierez pas directement de votre participation à cette recherche. Vous ne subirez qu'un minimum d'inconvénients en termes de temps passé à le compléter.

Toutes les données seront publiées sous forme agrégée et vous ne serez jamais identifié. Toutes les réponses anonymes seront stockées sur des serveurs sécurisés et des ordinateurs protégés par un mot de passe. Nous conserverons les données du sondage indéfiniment, et les données agrégées pourront être placées sur une plate-forme de stockage de données numériques telle que Dryad. Toutes les informations permettant d'identifier les participants seront supprimées après que nous aurons envoyé aux participants qui en ont fait la demande des informations complémentaires relatives aux résultats du sondage. Nous recueillerons les adresses IP pour vérifier que les participants ne répondent au sondage qu'une seule fois et toutes les adresses IP seront détruites immédiatement après cette vérification.

Les données feront partie d'un article scientifique sur les lacunes des connaissances en matière de conservation des plantes au Canada. Si vous fournissez votre nom et votre adresse électronique,

nous vous informerons de la publication de l'étude. Cette démarche est totalement facultative et votre nom ou votre adresse électronique ne seront pas liés à vos réponses.

Votre participation est volontaire et vous pouvez quitter le sondage à tout moment. Les réponses ne seront soumises que si vous cliquez sur le bouton « SOUMETTRE » à la fin du sondage. S'il y a une question à laquelle vous ne voulez pas répondre, choisissez simplement « Autre » et entrez « Je préfère ne pas répondre ».

Veillez noter que puisqu'il s'agit d'un sondage en ligne, nous ne pouvons pas garantir complètement votre confidentialité. En cliquant sur « SOUMETTRE » à la fin du sondage, vous reconnaissez avoir lu les objectifs et les procédures de l'étude mentionnés ci-dessus, et vous acceptez volontairement de participer à ce sondage. Une fois que vous aurez appuyé sur « SOUMETTRE », nous ne pourrons pas supprimer vos réponses, car les réponses individuelles ne seront pas identifiables à ce stade.

Si vous souhaitez obtenir une copie de ce formulaire de consentement, veuillez contacter [jl.mccune@uleth.ca](mailto:jl.mccune@uleth.ca) ou sélectionnez le bouton « Imprimer » pour imprimer ces informations.

Les questions concernant vos droits en tant que participant à cette recherche peuvent être soumises au Bureau d'éthique de la recherche (Office of Research Ethics) de l'Université de Lethbridge (téléphone: 403-329-2747 ou courriel: [research.services@uleth.ca](mailto:research.services@uleth.ca)).

Cliquez sur « suivant » pour commencer le sondage.

- Q1. Veuillez confirmer que vous avez 18 ans ou plus
- Oui, j'ai 18 ans ou plus.
  - J'ai moins de 18 ans.

*[if the second choice is selected, participants directed to a page that states: « Merci de l'intérêt que vous portez à ce sondage auprès des praticiens et chercheurs canadiens en conservation des plantes. Vous devez être âgé d'au moins 18 ans pour participer. »]*

- Q2. Quelle proportion de votre travail quotidien implique des activités qui nécessitent des connaissances en écologie/évolution végétale ou en conservation/restauration végétale? (sélectionnez une réponse)

- moins de 10%
- 10-20%
- 20-30%
- 30-40%
- 40-50%
- 50-60%
- 60-70%
- 70-80%

- 80-90%
- 90-100%
- Autre (inscrire votre réponse)

Q3. Quel terme décrit le mieux votre principal employeur actuel? (ou votre employeur le plus récent si vous êtes présentement sans emploi) (sélectionnez une réponse)

- gouvernement infra-municipal (p. ex. office de protection de la nature, canton)
- gouvernement municipal (p. ex. comté, ville)
- ministère provincial
- ministère fédéral
- gouvernement d'une Première nation ou conseil tribal
- petit cabinet d'experts-conseils ou autre petite entreprise (p. ex. pépinière de plantes indigènes)
- grand cabinet d'experts-conseils ou autre grande entreprise (p. ex. grande entreprise de restauration)
- petit organisme à but non lucratif (p. ex. petite fiducie foncière)
- grand organisme à but non lucratif (e.g. CNC, WWF, CFC)
- institution académique (université ou collège)
- travailleur(euse) autonome
- Autre (inscrire votre réponse)

Q4. Quelle est votre formation dans le domaine de la conservation des plantes, de la restauration des plantes ou de la recherche sur les plantes? (sélectionnez toutes les réponses qui s'appliquent)

- autodidacte/apprentissage par expérience
- formation d'apprenti or temps passé en compagnie d'experts
- école secondaire
- collège communautaire/technique
- diplôme de baccalauréat
- diplôme de maîtrise
- diplôme de doctorat
- Autre (inscrire votre réponse)

Q5. Si vous détenez un diplôme de baccalauréat, dans quelle discipline était-il ? (p. ex. botanique, sciences végétales, biologie/sciences biologiques, etc.) (sélectionnez une réponse)

- ne s'applique pas
- discipline du diplôme: (inscrire votre réponse)

Q6. Comment avez-vous développé un intérêt pour l'écologie/l'évolution des plantes ou la conservation/restauration des plantes? (sélectionnez toutes les réponses qui s'appliquent)

- J'ai toujours aimé les plantes.
- Mon enfance a été consacrée au jardinage, au camping ou à faire du plein air.
- J'ai eu un(e) excellent(e) mentor(e) pendant mes études secondaires ou universitaires (1er cycle).
- C'était principalement une simple circonstance, notre entreprise/organisation/laboratoire avait besoin de quelqu'un pour faire un travail relié aux plantes.
- Autre (inscrire votre réponse)

Q7. Dans quelle province ou territoire habitez-vous? (sélectionnez une réponse)

- Alberta
- Colombie-Britannique
- Manitoba
- Nouveau-Brunswick
- Terre-Neuve-et-Labrador
- Territoires du Nord-Ouest
- Nouvelle-Écosse
- Nunavut
- Ontario
- Île-du-Prince-Édouard
- Québec
- Saskatchewan
- Yukon
- Autre: (inscrire votre réponse)

Q8. Quel âge avez-vous? (sélectionnez une réponse)

- Moins de 20 ans
- 20-30 ans
- 30-40 ans
- 40-50 ans
- 50-60 ans
- 60-70 ans
- 70-80 ans
- 80-90 ans
- 90-100 ans
- Autre: (inscrire votre réponse)

Q9. Depuis combien de temps travaillez-vous dans le domaine de l'écologie/évolution des plantes ou de la conservation/restauration des plantes? (sélectionnez une réponse)

- moins de 5 ans
- 5-10 ans
- 10-15 ans
- 15-20 ans

- 20-25 ans
- 25-30 ans
- 30-35 ans
- 35-40 ans
- plus de 40 ans
- Autre: (inscrire votre réponse)

Q10. Quelles tâches ou recherches liées à l'écologie/évolution végétale ou la conservation/restauration des plantes faites-vous dans le cadre de votre emploi? Il peut s'agir de travaux pratiques et/ou de gestion/direction de ces activités. (sélectionnez toutes les réponses qui s'appliquent)

- utilisation des plantes pour étudier la théorie évolutionniste
- utilisation des plantes pour étudier la théorie écologique
- mesure de la diversité génétique au sein des populations et entre elles
- mesure de la diversité génétique liée à la résistance aux maladies
- recensements de populations
- évaluations de statut de conservation (p. ex. participation à des appels pour l'évaluation de menaces, rédaction de rapports de situation ou de programmes de rétablissement)
- gestion des zones naturelles afin de protéger les plantes indigènes (p. ex. élimination des mauvaises herbes, mise en place de clôtures pour interdire l'accès aux herbivores, détournement de sentiers créés par les humains, prévention du braconnage, traitement des maladies)
- restauration ou revégétalisation (p. ex. collecte de graines de plantes indigènes, culture de semis, transplantation de semis dans la nature)
- collecte de graines et propagation de plantes indigènes
- inventaires de plantes rares
- sensibilisation pour rehausser le profil des plantes indigènes et/ou des espèces végétales en péril parmi les propriétaires fonciers ou le grand public
- travail lié à la réglementation (p. ex. délivrance de permis, évaluation de l'impact des projets de développement proposés sur la végétation ou les espèces végétales en péril, consultation sur les évaluations d'impact)
- Autre: (inscrire votre réponse)

Q11. Si vous êtes chercheur dans un établissement universitaire, votre programme de recherche comprend-il des travaux sur des plantes rares (par exemple, des espèces végétales classées S1, S2 ou S3 par NatureServe ou inscrites sur la liste des lois fédérales ou provinciales sur les espèces en péril/menacées)? (sélectionnez une réponse)

- je ne suis pas un(e) chercheur(euse) universitaire
- oui dans le passé, mais pas actuellement
- rarement
- non
- Autre: (inscrire votre réponse)

Q12. Si vous êtes un chercheur universitaire et que vous avez étudié des plantes rares dans le cadre de votre programme de recherche, quelle(s) espèce(s) avez-vous étudiée(s)? (sélectionnez une réponse)

- Je ne suis pas un(e) chercheur(euse) universitaire
- Espèce(s): (inscrire votre réponse)
- Autre: (inscrire votre réponse)

Q13. *[for those who answer “oui dans le passé, mais pas actuellement”, “rarement”, or “non” to Q11]*

Quels sont les principaux défis ou difficultés qui vous empêchent de faire plus de recherche sur les espèces végétales en péril? (sélectionnez toutes les réponses qui s'appliquent)

- je ne suis tout simplement pas intéressé(e) par ces espèces
- il est difficile d'obtenir une bonne taille d'échantillon
- c'est trop risqué
- il est difficile d'obtenir des permis pour faire des expériences de manipulation sur des plantes rares
- je suis principalement motivé(e) par des questions théoriques fondamentales, donc je choisis le système d'étude le plus adapté pour cela
- je ne sais pas quelles recherches sont nécessaires dans ce domaine
- la recherche nécessaire dans ce domaine n'est pas assez novatrice pour que je puisse obtenir des publications solides et faire progresser ma carrière
- il est difficile d'obtenir du financement pour travailler sur des plantes rares
- Autre: (inscrire votre réponse)

Q14. Compte tenu de ce que vous savez au sujet de la conservation des plantes et le rétablissement des espèces végétales en péril au Canada, laquelle des propositions suivantes décrit le mieux votre opinion sur les progrès réalisés par le Canada dans ce domaine? (sélectionnez une réponse)

- Je ne connais pas assez la situation pour commenter.
- Le Canada se porte très bien. Nous avons désigné de nombreuses plantes en vertu de la Loi sur les espèces en péril, ce qui mène à des mesures de rétablissement significatives.
- Le Canada se situe dans la moyenne. Il ne faut pas s'attendre à autant d'attention ou de financement pour les plantes que pour les mammifères, les oiseaux et les poissons charismatiques. Il y a eu un bon financement et une bonne attention pour quelques espèces végétales en péril, mais nous pourrions faire mieux, comme la plupart des pays.
- Le Canada est sous-performant, surtout par rapport aux autres pays. Il y a une poignée de personnes dévouées et certaines bonnes choses se produisent, mais c'est une goutte d'eau dans l'océan par rapport aux besoins.
- Autre: (inscrire votre réponse)

Q15. À votre avis, quelles sont les deux lacunes les plus pressantes qui empêchent la conservation et le rétablissement des espèces végétales en péril dans votre région ou dans l'ensemble du Canada ? (en choisir deux)

- nous avons besoin de plus d'inventaires pour localiser les populations non découvertes
- nous avons besoin de plus d'évaluations et de suivis des populations de plantes rares au fil du temps
- nous devons mieux comprendre la diversité génétique
- nous avons besoin de plus de tests expérimentaux formels des menaces et de stratégies d'atténuation des menaces
- nous avons besoin davantage de réintroduction et d'augmentation des populations
- nous devons protéger davantage de terres comprenant des habitats importants
- nous devons former davantage de biologistes spécialisés dans la conservation des plantes
- nous avons besoin de plus de recherches sur ces espèces et sur la façon de les conserver
- nous devons sensibiliser davantage les propriétaires fonciers et/ou le public aux espèces végétales en péril
- nous avons besoin de lois plus strictes pour protéger les populations existantes d'espèces végétales en péril et d'une application efficace de ces lois
- nous avons besoin de plus de fonds de la part des gouvernements pour la recherche et la gestion appliquée afin de rétablir les espèces végétales en péril
- nous avons besoin de plus de fonds de la part des gouvernements pour la recherche et la gestion appliquée afin de rétablir toutes les espèces en péril, pas seulement les plantes
- nous devons mieux faire connaître les espèces végétales en péril au grand public
- Autre: (inscrire votre réponse)
- Autre: (inscrire votre réponse)

Q16. Veuillez inscrire tout commentaire supplémentaire concernant les lacunes dans les connaissances ou d'autres facteurs qui empêchent la conservation et le rétablissement des espèces végétales en péril dans votre région ou dans l'ensemble du Canada.

- Inscrire votre texte: (inscrire votre réponse)
- Je n'ai rien à ajouter
- Je préfère ne pas répondre

Q17. Laquelle des affirmations suivantes correspond le mieux à votre opinion sur la réintroduction d'espèces végétales en péril à des sites desquels elles ont disparu, ou à des sites appropriés de leur aire de répartition historique connue, afin de favoriser leur rétablissement et de réduire le risque d'extinction? (sélectionnez une réponse)

- Je ne connais pas assez la situation pour donner une opinion.
- Nous devons éviter de le faire. La priorité doit être la conservation in situ des populations existantes.
- Nous devrions en faire plus. Les réintroductions pourraient contribuer à augmenter le nombre de populations d'espèces très menacées.

- C'est peut-être une bonne chose d'essayer, mais cela ne fonctionnera pas pour toutes les espèces. Je serais en faveur de faire plus de recherches sur les possibilités pour certaines espèces.
- Autre: (inscrire votre réponse)

Q18. Environ 75 % des espèces végétales en péril au Canada sont à la limite de leur aire de répartition nord-américaine au Canada et plusieurs ne sont pas en péril au sud de la frontière. Lequel des énoncés suivants correspond le mieux à votre opinion? (sélectionnez une réponse)

- Les espèces végétales endémiques du Canada devraient être prioritaires pour le financement de la conservation et de la recherche.
- Les espèces végétales endémiques du Canada et les espèces rares sur l'ensemble de leur aire de répartition devraient être prioritaires pour le financement de la conservation et de la recherche.
- Les espèces végétales canadiennes en péril ne devraient pas être priorisées pour le financement de la conservation et de la recherche en fonction de leur statut à l'extérieur du Canada.
- Autre: (inscrire votre réponse)

Q19. Y a-t-il autre chose que vous aimeriez ajouter ou commenter concernant la conservation et le rétablissement des espèces végétales en péril au Canada? Veuillez l'inscrire ci-dessous ou sélectionnez « aucun commentaire à ajouter ».

- Inscrire votre commentaire: (inscrire votre réponse)
- aucun commentaire à ajouter

Q20. En cliquant sur « SOUMETTRE », vous reconnaissez avoir lu les objectifs et les procédures de l'étude au début de ce sondage et acceptez volontairement d'y participer.

**SOUMETTRE**

Q21. Merci de votre participation ! Si vous souhaitez partager votre nom et/ou votre adresse électronique avec les chercheurs afin de recevoir des mises à jour sur cette recherche, veuillez entrer ces informations ci-dessous. Notez que votre nom et votre adresse électronique ne seront PAS associés à vos réponses dans les résultats publiés de cette étude. Si vous préférez rester anonyme, sélectionnez "je souhaite rester anonyme".

- inscrivez votre nom et/ou adresse électronique: (inscrire le texte)
- je souhaite rester anonyme



## Supplementary Material 2

### McCune et al. The state of plant conservation in Canada: a survey of practitioners

**Table S1:** List of 80 species mentioned by respondents who identified themselves as researchers and who have studied rare plant species. Included is the scientific name, common name, the number of researchers who mentioned the species (#mentions), whether or not a federal Recovery Strategy has been proposed for the species (RSProp – Y=yes, N=no), taxonomic group (VP = vascular plants, MO = mosses, LI = lichen), endemcity (Range – E = endemic, P = peripheral, C = Cosmopolitan), G ranks, N ranks, the province(s) in which it occurs (S rank in parentheses), whether the species is listed on Schedule one of the SARA (Sched1 – Y = yes, N = no), and SARA and COSEWIC status.

| Scientific name                                       | Common name                 | #mentions | RSProp | Group | Range      | GRank | NRank | Province                              | Sched1 | SARA | COSEWIC |
|-------------------------------------------------------|-----------------------------|-----------|--------|-------|------------|-------|-------|---------------------------------------|--------|------|---------|
| <i>Acer nigrum</i>                                    | Black Maple                 | 1         | N      | VP    | P          | 5     | 4     | ON (S4?), QC (S3)                     | N      | NA   | NA      |
| <i>Achillea millefolium</i> var. <i>megacephala</i>   | Large-headed Woolly Yarrow  | 1         | N      | VP    | E          | 1,2   | 1,2   | SK (S1S2)                             | Y      | SC   | SC      |
| <i>Adiantum pedatum</i>                               | Northern Maidenhair Fern    | 1         | N      | VP    | P          | 5     | 5     | QC (S4), ON (S5), NB (S3), NS (S1)    | N      | NA   | NA      |
| <i>Allium tricoccum</i>                               | Small White Leek            | 1         | N      | VP    | P          | 5     | 4     | NB (S2S3), NS (S2), ON (S4), QC (S3)  | N      | NA   | NA      |
| <i>Ammannia robusta</i>                               | Scarlet Ammannia            | 1         | Y      | VP    | P          | 5     | 1     | BC (S1), ON (S1)                      | Y      | EN   | EN      |
| <i>Armeria maritima</i> ssp. <i>interior</i>          | Athabasca Thrift            | 1         | N      | VP    | E          | 1,2   | 1,2   | SK (S1S2), MB (S1), ON (S3), YK (S3)  | Y      | SC   | SC      |
| <i>Asplenium scolopendrium</i> var. <i>americanum</i> | American Hart's-tongue Fern | 1         | N      | VP    | E (nearly) | 3     | 3     | ON (S3)                               | Y      | SC   | SC      |
| <i>Astragalus robbinsii</i> var. <i>feraldii</i>      | Fernald's Milkvetch         | 1         | N      | VP    | E          | 1     | 1,2   | QC (S1)                               | Y      | SC   | SC      |
| <i>Balsamorhiza deltoidea</i>                         | Deltoid Balsamroot          | 1         | Y      | VP    | P          | 5     | 2     | BC (S2)                               | Y      | EN   | EN      |
| <i>Bartramia halleriana</i>                           | Haller's Apple Moss         | 2         | Y      | MO    | P          | 4     | 2     | BC (S2), AB (S1)                      | Y      | TH   | TH      |
| <i>Bartramia stricta</i>                              | Rigid Apple Moss            | 1         | Y      | MO    | P          |       | 2     | BC (S2)                               | N      | EN   | EN      |
| <i>Botrychium campestre</i>                           | Prairie Dunewort            | 1         | N      | VP    | P          | 3,4   | 3     | AB (S3), MB (S1), SK (S2), ON (S1/S2) | N      | NA   | NA      |

| Scientific name                                        | Common name                                  | #mentions | RSPProp | Group | Range | GRank | NRank | Province                                    | Sched1 | SARA | COSEWIC |
|--------------------------------------------------------|----------------------------------------------|-----------|---------|-------|-------|-------|-------|---------------------------------------------|--------|------|---------|
| <i>Bouteloua curtipendula</i> var. <i>curtipendula</i> | Sideoats Grama                               | 1         | N       | VP    | P     | 5     | 3     | AB (S1), SK (S3), MB (S2), ON (S2)          | N      | NA   | NA      |
| <i>Braya fernaldii</i>                                 | Fernald's Braya                              | 1         | Y       | VP    | E     | 1     | 1     | NL (S1)                                     | Y      | TH   | EN      |
| <i>Braya longii</i>                                    | Long's Braya                                 | 1         | Y       | VP    | E     | 1     | 1     | NL (S1)                                     | Y      | EN   | EN      |
| <i>Calla palustris</i>                                 | Wild Calla                                   | 1         | N       | VP    | P     | 5     | 5     | NL (S2S3)                                   | N      | NA   | NA      |
| <i>Calochortus lyallii</i>                             | Lyall's Mariposa Lily                        | 1         | N       | VP    | P     | 3,4   | 3     | BC (S3)                                     | Y      | SC   | SC      |
| <i>Calypto bulbosa</i>                                 | Fairy Slipper                                | 1         | N       | VP    | P     | 5     | 5     | SK (S3), NB (S2), NL (S1), ON (S4), NU (S1) | N      |      |         |
| <i>Carex juniperorum</i>                               | Juniper Sedge                                | 1         | Y       | VP    | P     | 3     | 1     | ON (S1)                                     | Y      | EN   | EN      |
| <i>Carex lupuliformis</i>                              | False Hop Sedge                              | 1         | Y       | VP    | P     | 4     | 1     | ON (S1), QC (S1)                            | Y      | EN   | EN      |
| <i>Carex virescens</i>                                 | Ribbed Sedge                                 | 1         | N       | VP    | P     | 5     | 3     | ON (S2), QC (S1)                            | N      | NA   | NA      |
| <i>Celtis tenuifolia</i>                               | Dwarf Hackberry                              | 1         | Y       | VP    | P     | 5     | 2     | ON (S2)                                     | Y      | TH   | TH      |
| <i>Cirsium hillii</i>                                  | Hill's Thistle                               | 1         | Y       | VP    | P     | 3     | 3     | ON (S3)                                     | Y      | TH   | TH      |
| <i>Cirsium scariosum</i>                               | Drummond's Thistle                           | 1         | N       | VP    | P     | 5     | 3     | BC (S3), AB (S2)                            | N      | NA   | EN      |
| <i>Cornus florida</i>                                  | Eastern Flowering Dogwood                    | 1         | Y       | VP    | P     | 5     | 2     | ON (S3)                                     | Y      | EN   | EN      |
| <i>Cryptantha minima</i>                               | Tiny Cryptantha                              | 1         | Y       | VP    | P     | 5     | 3     | AB (S2), SK (S1)                            | Y      | EN   | TH      |
| <i>Cypripedium candidum</i>                            | Small White Lady's-slipper                   | 2         | Y       | VP    | P     | 5     | 2     | MB (S2), ON (S1)                            | Y      | EN   | TH      |
| <i>Cypripedium reginae</i>                             | Showy Lady's-slipper                         | 1         | N       | VP    | P     | 4     | 4,5   | SK (S1), NB (S3), NS (S2), QC (S3), NL (S3) | N      | NA   | NA      |
| <i>Dalea villosa</i>                                   | Hairy Prairie-clover                         | 2         | N       | VP    | P     | 5     | 2, 3  | SK (S1), MB (S2S3)                          | Y      | SC   | SC      |
| <i>Deschampsia mackenzieana</i>                        | Mackenzie Hairgrass                          | 1         | N       | VP    | E     | 2     | 2     | SK (S2), NWT (S2)                           | Y      | SC   | SC      |
| <i>Eleocharis geniculata</i>                           | Bent Spike-rush Southern Mountain population | 1         | Y       | VP    | P     | 5     | 1,2   | BC (S1)                                     | Y      | EN   | EN      |
| <i>Eleocharis palustris</i>                            | Creeping Spikerush                           | 1         | N       | VP    | C     | 5     | 5     | NU (S3)                                     | N      | NA   | NA      |
| <i>Festuca hallii</i>                                  | Rough Fescue                                 | 1         | N       | VP    | P     | 5     | 5     | MB (S3), ON (S1), SK (S3)                   | N      | NA   | NA      |

| Scientific name                                  | Common name                     | #mentions | RSPProp | Group | Range | GRank | NRank | Province                   | Sched1 | SARA | COSEWIC |
|--------------------------------------------------|---------------------------------|-----------|---------|-------|-------|-------|-------|----------------------------|--------|------|---------|
| <i>Fraxinus profunda</i>                         | Pumpkin Ash                     | 1         | N       | VP    | P     | 4     | 1     | ON (S1)                    | N      | NA   | EN      |
| <i>Gymnocladus dioicus</i>                       | Kentucky Coffee-tree            | 1         | Y       | VP    | P     | 5     | 2     | ON (S2)                    | Y      | TH   | TH      |
| <i>Hydrastis canadensis</i>                      | Goldenseal                      | 1         | Y       | VP    | P     | 4     | 2     | ON (S2)                    | Y      | TH   | SC      |
| <i>Iris lacustris</i>                            | Dwarf Lake Iris                 | 1         | Y       | VP    | P     | 3     | 3     | ON (S3)                    | Y      | TH   | SC      |
| <i>Justicia americana</i>                        | American Water-willow           | 1         | Y       | VP    | P     | 5     | 2     | ON (S2), QC (S2)           | Y      | TH   | TH      |
| <i>Koeleria asiatica</i>                         | Oriental Junegrass              | 1         | N       | VP    | C     | 4     | 2,3   | NT (S2), YK (S2S3)         | N      | NA   | NA      |
| <i>Liatris cylindracea</i>                       | Slender Blazingstar             | 1         | N       | VP    | P     | 5     | 3     | ON (S3)                    | N      | NA   | NA      |
| <i>Magnolia acuminata</i>                        | Cucumber Tree                   | 1         | Y       | VP    | P     | 5     | 2     | ON (S2)                    | Y      | EN   | EN      |
| <i>Maianthemum stellatum</i>                     | Starflower Solomon's-plume      | 1         | N       | VP    | P     | 5     | 5     | NL (S2S3), PE (S3)         | N      | NA   | NA      |
| <i>Mertensia virginica</i>                       | Virginia Bluebells              | 1         | N       | VP    | P     | 5     | 3     | ON (S3)                    | N      | NA   | NA      |
| <i>Morus rubra</i>                               | Red Mulberry                    | 1         | Y       | VP    | P     | 5     | 2     | ON (S2)                    | Y      | EN   | EN      |
| <i>Opuntia humifusa</i>                          | Eastern Prickly Pear Cactus     | 1         | Y       | VP    | P     | 5     | 1     | ON                         | Y      | EN   | EN      |
| <i>Panax quinquefolius</i>                       | American Ginseng                | 2         | Y       | VP    | P     | 5     | 2     | ON (S2), QC (S2)           | Y      | EN   | EN      |
| <i>Phlox speciosa occidentalis</i>               | Showy Phlox                     | 1         | Y       | VP    | P     | 5     | 2     | BC (S2)                    | Y      | TH   | TH      |
| <i>Physconia subpallida</i>                      | Pale-bellied Frost Lichen       | 1         | Y       | LI    | P     | NA    | 3     | ON (S3)                    | N      | EN   | EN      |
| <i>Pinus albicaulis</i>                          | Whitebark Pine                  | 2         | Y       | VP    | C     | 3     | 3     | BC (S2), AB (S2)           | Y      | EN   | EN      |
| <i>Platanthera blephariglottis</i>               | White Fringed Orchid            | 1         | N       | VP    | P     | 5     | 4,5   | NB (S3), PE (S2)           | N      | NA   | NA      |
| <i>Polemonium vanbruntiae</i>                    | Van Brunt's Jacob's-ladder      | 2         | Y       | VP    | P     | 3     | 2     | QC (S2)                    | Y      | TH   | TH      |
| <i>Potamogeton alpinus</i>                       | Northern Pondweed               | 1         | N       | VP    | C     | 5     | 5     | PE (S1S2), NU (S3)         | N      | NA   | NA      |
| <i>Ptelea trifoliata</i>                         | Common Hoptree                  | 1         | Y       | VP    | P     | 5     | 3     | ON (S3)                    | Y      | TH   | TH      |
| <i>Quercus bicolor</i>                           | Swamp White Oak                 | 1         | N       | VP    | P     | 5     | 4     | QC (S2)                    | N      | NA   | NA      |
| <i>Quercus garryana</i>                          | Garry Oak                       | 1         | N       | VP    | P     | 5     | 5     | BC (S5)                    | N      | NA   | NA      |
| <i>Rhododendron groenlandicum</i>                | Common Labrador-tea             | 1         | N       | VP    | P     | 5     | 5     | all (S5 except Nunavut S4) | N      | NA   | NA      |
| <i>Sabatia kennedyana</i>                        | Plymouth Gentian                | 1         | Y       | VP    | P     | 3     | 1     | NS (S2)                    | Y      | TH   | EN      |
| <i>Salix brachycarpa</i> var. <i>psammophila</i> | Sand-dune Short-capsuled Willow | 1         | N       | VP    | E     | 3     | 3     | SK (S3)                    | Y      | SC   | SC      |
| <i>Salix silicicola</i>                          | Blanketleaf Willow              | 1         | N       | VP    | E     | 2,3   | 2,3   | SK(S2)                     | Y      | SC   | SC      |
| <i>Salix turnorii</i>                            | Turnor's Willow                 | 1         | N       | VP    | E     | 2     | 2     | SK(S2)                     | Y      | SC   | SC      |

| Scientific name                                  | Common name                                   | #mentions | RSPprop | Group | Range      | GRank | NRank | Province                                      | Sched1 | SARA | COSEWIC |
|--------------------------------------------------|-----------------------------------------------|-----------|---------|-------|------------|-------|-------|-----------------------------------------------|--------|------|---------|
| <i>Schistochilopsis grandiretis</i>              | Purple-lobed Notchwort                        | 1         | N       | MO    | C          | 3     | U     | ON (S1), QC (S1)                              | N      | NA   | NA      |
| <i>Sida hermaphrodita</i>                        | Virginia Mallow                               | 1         | Y       | VP    | P          | 3     | 1     | ON (S1)                                       | Y      | EN   | EN      |
| <i>Solidago houghtonii</i>                       | Houghton's Goldenrod                          | 1         | N       | VP    | E (nearly) | 3     | 2     | ON (S2)                                       | Y      | SC   | SC      |
| <i>Spiranthes diluvialis</i>                     | Ute Ladies'-tresses                           | 1         | N       | VP    | P          | 2,3   | 1     | BC (S1)                                       | N      | NA   | EN      |
| <i>Sporobolus heterolepis</i>                    | Northern Dropseed                             | 1         | N       | VP    | P          | 5     | 3,5   | SK (S3), ON (S3), QC (S3)                     | N      | NA   | NA      |
| <i>Stylophorum diphyllum</i>                     | Wood-poppy                                    | 1         | Y       | VP    | P          | 5     | 1     | ON (S1)                                       | Y      | EN   | EN      |
| <i>Symphotrichum laurentianum</i>                | Gulf of St. Lawrence Aster                    | 2         | Y       | VP    | E          | 2     | 2     | QC (S1), NB (S1), PE (S1)                     | Y      | TH   | TH      |
| <i>Tanacetum huronense</i> var. <i>floccosum</i> | Lake Huron Tansy                              | 1         | N       | VP    | P          | 3     | 3     | SK (S3)                                       | Y      | SC   | SC      |
| <i>Tetraneuris herbacea</i>                      | Lakeside Daisy                                | 1         | Y       | VP    | E          | 3     | 3     | ON (S3)                                       | Y      | TH   | TH      |
| <i>Tradescantia occidentalis</i>                 | Western Spiderwort                            | 1         | Y       | VP    | P          | 5     | 2     | AB (S1), SK (S1S2), MB (S1)                   | Y      | TH   | TH      |
| <i>Trichophorum clintonii</i>                    | Clinton's Bulrush                             | 1         | N       | VP    | P          | 4     | 3,4   | AB (S2), SK (S1), ON (S2S3), QC (S3), NB (S3) | N      | NA   | NA      |
| <i>Trichophorum planifolium</i>                  | Bashful Bulrush                               | 1         | Y       | VP    | P          | 4     | 1     | ON (S1)                                       | Y      | EN   | EN      |
| <i>Trichophorum pumilum</i>                      | Rolland's Leafless-bulrush                    | 1         | N       | VP    | P          | 5     | 4     | AB (S3), SK (S1), QC (S2S3), YK (S2)          | N      | NA   | NA      |
| <i>Tripteroalyx micranthus</i>                   | Small-flowered Sand-verbena                   | 1         | Y       | VP    | P          | 5     | 2     | AB (S2), SK (S2)                              | Y      | EN   | EN      |
| <i>Tritomaria laxa</i>                           | Marsh Notchwort                               | 1         | N       | MO    | E (nearly) | 4     | NU    | QC (S1)                                       | N      | NA   | NA      |
| <i>Ulmus thomasi</i>                             | Rock Elm                                      | 1         | N       | VP    | P          | 5     | 4     | QC (S2)                                       | N      | NA   | NA      |
| <i>Vaccinium stamineum</i>                       | Deerberry                                     | 1         | Y       | VP    | P          | 5     | 1     | ON (S1)                                       | Y      | TH   | TH      |
| <i>Viola praemorsa praemorsa</i>                 | Yellow Montane Violet<br>praemorsa subspecies | 1         | Y       | VP    | P          | 4     | 2     | AB (S2), BC (S1)                              | Y      | EN   | EN      |
| <i>Viola renifolia</i>                           | Kidneyleaf White Violet                       | 1         | N       | VP    | P          | 5     | 5     | NL (S3), PE (S3)                              | N      | NA   | NA      |
| <i>Zygodon gracilis</i>                          | Slender Yoke Moss                             | 1         | N       | MO    | P          | 2     | 1     | BC (S1S2)                                     | N      | NA   | EN      |
